# Supplementary material for: Lymph node detection in MR Lymphography: false positive reduction using multi-view convolutional neural networks
Source: PeerJ. 2019 Nov 22;7:e8052. doi: 10.7717/peerj.8052 (PMC6876485; doi:10.7717/peerj.8052)
Supplement: Dataset S4 [file peerj-07-8052-s004.csv]

0.0	0.0	1
0.000234301780694	0.0	0.731055
0.00140581068416	0.0	0.731055
0.00140581068416	0.000234301780694	0.731055
0.00164011246485	0.000234301780694	0.731055
0.00164011246485	0.000702905342081	0.731055
0.00187441424555	0.000702905342081	0.731055
0.00187441424555	0.00164011246485	0.731055
0.00328022492971	0.00164011246485	0.731055
0.00328022492971	0.00210871602624	0.731055
0.0037488284911	0.00210871602624	0.731055
0.0037488284911	0.00234301780694	0.731055
0.00421743205248	0.00234301780694	0.731055
0.00421743205248	0.00257731958763	0.731055
0.00515463917526	0.00257731958763	0.731055
0.00515463917526	0.00281162136832	0.731055
0.00538894095595	0.00281162136832	0.731055
0.00538894095595	0.0035145267104	0.731055
0.00585754451734	0.0035145267104	0.731055
0.00585754451734	0.0037488284911	0.731055
0.00609184629803	0.0037488284911	0.731055
0.00609184629803	0.00445173383318	0.731055
0.00632614807873	0.00445173383318	0.731055
0.00632614807873	0.00468603561387	0.731055
0.0072633552015	0.00468603561387	0.731055
0.0072633552015	0.00585754451734	0.731055
0.00820056232427	0.00585754451734	0.731055
0.00820056232427	0.00609184629803	0.731055
0.00843486410497	0.00609184629803	0.731055
0.00843486410497	0.00632614807873	0.731055
0.00890346766635	0.00632614807873	0.731055
0.00890346766635	0.00656044985942	0.731055
0.00913776944705	0.00656044985942	0.731055
0.00913776944705	0.00843486410497	0.731055
0.00960637300843	0.00843486410497	0.731055
0.00960637300843	0.00890346766635	0.731055
0.0100749765698	0.00890346766635	0.731055
0.0100749765698	0.00913776944705	0.731055
0.0124179943768	0.00913776944705	0.731055
0.0124179943768	0.00984067478913	0.731055
0.0135895032802	0.00984067478913	0.731055
0.0135895032802	0.0103092783505	0.731055
0.014526710403	0.0103092783505	0.731055
0.014526710403	0.0112464854733	0.731055
0.0159325210872	0.0112464854733	0.731055
0.0159325210872	0.0117150890347	0.731055
0.0164011246485	0.0117150890347	0.731055
0.0164011246485	0.0121836925961	0.731055
0.0173383317713	0.0121836925961	0.731055
0.0173383317713	0.0124179943768	0.731055
0.0178069353327	0.0124179943768	0.731055
0.0178069353327	0.0126522961575	0.731055
0.0185098406748	0.0126522961575	0.731055
0.0185098406748	0.0128865979381	0.731055
0.0187441424555	0.0128865979381	0.731055
0.0187441424555	0.0133552014995	0.731055
0.0194470477976	0.0133552014995	0.731055
0.0194470477976	0.0135895032802	0.731055
0.0196813495783	0.0135895032802	0.731055
0.0196813495783	0.0138238050609	0.731055
0.0203842549203	0.0138238050609	0.731055
0.0203842549203	0.0140581068416	0.731055
0.020618556701	0.0140581068416	0.731055
0.020618556701	0.014526710403	0.731055
0.0208528584817	0.014526710403	0.731055
0.0208528584817	0.0149953139644	0.731055
0.0213214620431	0.0149953139644	0.731055
0.0213214620431	0.0154639175258	0.731055
0.0224929709466	0.0154639175258	0.731055
0.0224929709466	0.0156982193065	0.731055
0.0231958762887	0.0156982193065	0.731055
0.0231958762887	0.0159325210872	0.731055
0.0234301780694	0.0159325210872	0.731055
0.0234301780694	0.0161668228679	0.731055
0.02366447985	0.0161668228679	0.731055
0.02366447985	0.0166354264292	0.731055
0.0238987816307	0.0166354264292	0.731055
0.0238987816307	0.0168697282099	0.731055
0.0250702905342	0.0168697282099	0.731055
0.0250702905342	0.0171040299906	0.731055
0.0257731958763	0.0171040299906	0.731055
0.0257731958763	0.0173383317713	0.731055
0.026007497657	0.0173383317713	0.731055
0.026007497657	0.017572633552	0.731055
0.0274133083411	0.017572633552	0.731055
0.0274133083411	0.0178069353327	0.731055
0.0278819119025	0.0178069353327	0.731055
0.0278819119025	0.0180412371134	0.731055
0.0281162136832	0.0180412371134	0.731055
0.0281162136832	0.0182755388941	0.731055
0.0288191190253	0.0182755388941	0.731055
0.0288191190253	0.0185098406748	0.731055
0.0295220243674	0.0185098406748	0.731055
0.0295220243674	0.0187441424555	0.731055
0.0297563261481	0.0187441424555	0.731055
0.0297563261481	0.0189784442362	0.731055
0.0299906279288	0.0189784442362	0.731055
0.0299906279288	0.0192127460169	0.731055
0.0306935332709	0.0192127460169	0.731055
0.0306935332709	0.0194470477976	0.731055
0.0318650421743	0.0194470477976	0.731055
0.0318650421743	0.019915651359	0.731055
0.032099343955	0.019915651359	0.731055
0.032099343955	0.0201499531396	0.731055
0.0330365510778	0.0201499531396	0.731055
0.0330365510778	0.020618556701	0.731055
0.0335051546392	0.020618556701	0.731055
0.0335051546392	0.0208528584817	0.731055
0.0337394564199	0.0208528584817	0.731055
0.0337394564199	0.0210871602624	0.731055
0.0339737582006	0.0210871602624	0.731055
0.0339737582006	0.0213214620431	0.731055
0.0344423617619	0.0213214620431	0.731055
0.0344423617619	0.0217900656045	0.731055
0.0346766635426	0.0217900656045	0.731055
0.0346766635426	0.0222586691659	0.731055
0.0349109653233	0.0222586691659	0.731055
0.0349109653233	0.0224929709466	0.731055
0.035145267104	0.0224929709466	0.731055
0.035145267104	0.022961574508	0.731055
0.0353795688847	0.022961574508	0.731055
0.0353795688847	0.0231958762887	0.731055
0.037488284911	0.0231958762887	0.731055
0.037488284911	0.0234301780694	0.731055
0.0379568884724	0.0234301780694	0.731055
0.0379568884724	0.0238987816307	0.731055
0.0386597938144	0.0238987816307	0.731055
0.0386597938144	0.0241330834114	0.731055
0.0388940955951	0.0241330834114	0.731055
0.0388940955951	0.0243673851921	0.731055
0.0398313027179	0.0243673851921	0.731055
0.0398313027179	0.0246016869728	0.731055
0.0407685098407	0.0246016869728	0.731055
0.0407685098407	0.0248359887535	0.731055
0.0417057169634	0.0248359887535	0.731055
0.0417057169634	0.0255388940956	0.731055
0.0419400187441	0.0255388940956	0.731055
0.0419400187441	0.0257731958763	0.731055
0.0421743205248	0.0257731958763	0.731055
0.0421743205248	0.0264761012184	0.731055
0.0424086223055	0.0264761012184	0.731055
0.0424086223055	0.0267104029991	0.731055
0.0431115276476	0.0267104029991	0.731055
0.0431115276476	0.0269447047798	0.731055
0.0433458294283	0.0269447047798	0.731055
0.0433458294283	0.0271790065604	0.731055
0.0438144329897	0.0271790065604	0.731055
0.0438144329897	0.0278819119025	0.731055
0.0445173383318	0.0278819119025	0.731055
0.0445173383318	0.0283505154639	0.731055
0.0447516401125	0.0283505154639	0.731055
0.0447516401125	0.0285848172446	0.731055
0.0449859418932	0.0285848172446	0.731055
0.0449859418932	0.0288191190253	0.731055
0.0454545454545	0.0288191190253	0.731055
0.0454545454545	0.029053420806	0.731055
0.0456888472352	0.029053420806	0.731055
0.0456888472352	0.0292877225867	0.731055
0.0459231490159	0.0292877225867	0.731055
0.0459231490159	0.0295220243674	0.731055
0.0463917525773	0.0295220243674	0.731055
0.0463917525773	0.0297563261481	0.731055
0.0470946579194	0.0297563261481	0.731055
0.0470946579194	0.0299906279288	0.731055
0.0475632614808	0.0299906279288	0.731055
0.0475632614808	0.0302249297095	0.731055
0.0480318650422	0.0302249297095	0.731055
0.0480318650422	0.0304592314902	0.731055
0.0482661668229	0.0304592314902	0.731055
0.0482661668229	0.0306935332709	0.731055
0.0489690721649	0.0306935332709	0.731055
0.0489690721649	0.0309278350515	0.731055
0.0494376757263	0.0309278350515	0.731055
0.0494376757263	0.0316307403936	0.731055
0.0499062792877	0.0316307403936	0.731055
0.0499062792877	0.0318650421743	0.731055
0.0501405810684	0.0318650421743	0.731055
0.0501405810684	0.0323336457357	0.731055
0.0503748828491	0.0323336457357	0.731055
0.0503748828491	0.0325679475164	0.731055
0.0506091846298	0.0325679475164	0.731055
0.0506091846298	0.0328022492971	0.731055
0.0515463917526	0.0328022492971	0.731055
0.0515463917526	0.0330365510778	0.731055
0.052014995314	0.0330365510778	0.731055
0.052014995314	0.0332708528585	0.731055
0.0524835988754	0.0332708528585	0.731055
0.0524835988754	0.0335051546392	0.731055
0.0531865042174	0.0335051546392	0.731055
0.0531865042174	0.0339737582006	0.731055
0.0534208059981	0.0339737582006	0.731055
0.0534208059981	0.0342080599813	0.731055
0.0541237113402	0.0342080599813	0.731055
0.0541237113402	0.0344423617619	0.731055
0.0543580131209	0.0344423617619	0.731055
0.0543580131209	0.0346766635426	0.731055
0.0548266166823	0.0346766635426	0.731055
0.0548266166823	0.035145267104	0.731055
0.055060918463	0.035145267104	0.731055
0.055060918463	0.0353795688847	0.731055
0.0552952202437	0.0353795688847	0.731055
0.0552952202437	0.0363167760075	0.731055
0.0559981255858	0.0363167760075	0.731055
0.0559981255858	0.0365510777882	0.731055
0.0567010309278	0.0365510777882	0.731055
0.0567010309278	0.0367853795689	0.731055
0.0571696344892	0.0367853795689	0.731055
0.0571696344892	0.0370196813496	0.731055
0.058106841612	0.0370196813496	0.731055
0.058106841612	0.0372539831303	0.731055
0.0588097469541	0.0372539831303	0.731055
0.0588097469541	0.037488284911	0.731055
0.0604498594189	0.037488284911	0.731055
0.0604498594189	0.0379568884724	0.731055
0.0609184629803	0.0379568884724	0.731055
0.0609184629803	0.038191190253	0.731055
0.061152764761	0.038191190253	0.731055
0.061152764761	0.0384254920337	0.731055
0.0613870665417	0.0384254920337	0.731055
0.0613870665417	0.0386597938144	0.731055
0.0616213683224	0.0386597938144	0.731055
0.0616213683224	0.0398313027179	0.731055
0.0618556701031	0.0398313027179	0.731055
0.0618556701031	0.0402999062793	0.731055
0.0620899718838	0.0402999062793	0.731055
0.0620899718838	0.04053420806	0.731055
0.0625585754452	0.04053420806	0.731055
0.0625585754452	0.0407685098407	0.731055
0.0627928772259	0.0407685098407	0.731055
0.0627928772259	0.0426429240862	0.731055
0.0632614807873	0.0426429240862	0.731055
0.0632614807873	0.0428772258669	0.731055
0.0653701968135	0.0428772258669	0.731055
0.0653701968135	0.0431115276476	0.731055
0.0663074039363	0.0431115276476	0.731055
0.0663074039363	0.043580131209	0.731055
0.0674789128397	0.043580131209	0.731055
0.0674789128397	0.0438144329897	0.731055
0.0679475164011	0.0438144329897	0.731055
0.0679475164011	0.0442830365511	0.731055
0.0684161199625	0.0442830365511	0.731055
0.0684161199625	0.0445173383318	0.731055
0.0688847235239	0.0445173383318	0.731055
0.0688847235239	0.0449859418932	0.731055
0.069587628866	0.0449859418932	0.731055
0.069587628866	0.0452202436739	0.731055
0.0700562324274	0.0452202436739	0.731055
0.0700562324274	0.0456888472352	0.731055
0.0705248359888	0.0456888472352	0.731055
0.0705248359888	0.0459231490159	0.731055
0.0716963448922	0.0459231490159	0.731055
0.0716963448922	0.0461574507966	0.731055
0.0719306466729	0.0461574507966	0.731055
0.0719306466729	0.046626054358	0.731055
0.072633552015	0.046626054358	0.731055
0.072633552015	0.0468603561387	0.731055
0.0731021555764	0.0468603561387	0.731055
0.0731021555764	0.0470946579194	0.731055
0.0735707591378	0.0470946579194	0.731055
0.0735707591378	0.0473289597001	0.731055
0.0738050609185	0.0473289597001	0.731055
0.0738050609185	0.0475632614808	0.731055
0.0745079662605	0.0475632614808	0.731055
0.0745079662605	0.0477975632615	0.731055
0.0749765698219	0.0477975632615	0.731055
0.0749765698219	0.0482661668229	0.731055
0.075679475164	0.0482661668229	0.731055
0.075679475164	0.0485004686036	0.731055
0.0759137769447	0.0485004686036	0.731055
0.0759137769447	0.0489690721649	0.731055
0.0761480787254	0.0489690721649	0.731055
0.0761480787254	0.0492033739456	0.731055
0.0796626054358	0.0492033739456	0.731055
0.0796626054358	0.0494376757263	0.731055
0.0798969072165	0.0494376757263	0.731055
0.0798969072165	0.049671977507	0.731055
0.0808341143393	0.049671977507	0.731055
0.0808341143393	0.0501405810684	0.731055
0.08106841612	0.0501405810684	0.731055
0.08106841612	0.0503748828491	0.731055
0.0813027179007	0.0503748828491	0.731055
0.0813027179007	0.0508434864105	0.731055
0.0815370196813	0.0508434864105	0.731055
0.0815370196813	0.0513120899719	0.731055
0.0820056232427	0.0513120899719	0.731055
0.0820056232427	0.0515463917526	0.731055
0.0822399250234	0.0515463917526	0.731055
0.0822399250234	0.0517806935333	0.731055
0.0827085285848	0.0517806935333	0.731055
0.0827085285848	0.052014995314	0.731055
0.0843486410497	0.052014995314	0.731055
0.0843486410497	0.0524835988754	0.731055
0.0845829428304	0.0524835988754	0.731055
0.0845829428304	0.0531865042174	0.731055
0.0850515463918	0.0531865042174	0.731055
0.0850515463918	0.0534208059981	0.731055
0.0862230552952	0.0534208059981	0.731055
0.0862230552952	0.0536551077788	0.731055
0.0869259606373	0.0536551077788	0.731055
0.0869259606373	0.0543580131209	0.731055
0.0880974695408	0.0543580131209	0.731055
0.0880974695408	0.0545923149016	0.731055
0.0883317713215	0.0545923149016	0.731055
0.0883317713215	0.0548266166823	0.731055
0.0885660731022	0.0548266166823	0.731055
0.0885660731022	0.0552952202437	0.731055
0.0890346766635	0.0552952202437	0.731055
0.0890346766635	0.0555295220244	0.731055
0.0892689784442	0.0555295220244	0.731055
0.0892689784442	0.0557638238051	0.731055
0.0913776944705	0.0557638238051	0.731055
0.0913776944705	0.0559981255858	0.731055
0.0916119962512	0.0559981255858	0.731055
0.0916119962512	0.0562324273664	0.731055
0.0925492033739	0.0562324273664	0.731055
0.0925492033739	0.0564667291471	0.731055
0.0948922211809	0.0564667291471	0.731055
0.0948922211809	0.0567010309278	0.731055
0.0951265229616	0.0567010309278	0.731055
0.0951265229616	0.0569353327085	0.731055
0.0977038425492	0.0569353327085	0.731055
0.0977038425492	0.0576382380506	0.731055
0.0984067478913	0.0576382380506	0.731055
0.0984067478913	0.058106841612	0.731055
0.098641049672	0.058106841612	0.731055
0.098641049672	0.0583411433927	0.731055
0.0991096532334	0.0583411433927	0.731055
0.0991096532334	0.0585754451734	0.731055
0.0993439550141	0.0585754451734	0.731055
0.0993439550141	0.0588097469541	0.731055
0.0998125585754	0.0588097469541	0.731055
0.0998125585754	0.0590440487348	0.731055
0.100984067479	0.0590440487348	0.731055
0.100984067479	0.0597469540769	0.731055
0.10121836926	0.0597469540769	0.731055
0.10121836926	0.0599812558575	0.731055
0.101921274602	0.0599812558575	0.731055
0.101921274602	0.0602155576382	0.731055
0.102155576382	0.0602155576382	0.731055
0.102155576382	0.0604498594189	0.731055
0.103092783505	0.0604498594189	0.731055
0.103092783505	0.0606841611996	0.731055
0.103561387067	0.0606841611996	0.731055
0.103561387067	0.0609184629803	0.731055
0.104029990628	0.0609184629803	0.731055
0.104029990628	0.061152764761	0.731055
0.10473289597	0.061152764761	0.731055
0.10473289597	0.0613870665417	0.731055
0.105201499531	0.0613870665417	0.731055
0.105201499531	0.0618556701031	0.731055
0.106138706654	0.0618556701031	0.731055
0.106138706654	0.0620899718838	0.731055
0.107778819119	0.0620899718838	0.731055
0.107778819119	0.0625585754452	0.731055
0.108950328022	0.0625585754452	0.731055
0.108950328022	0.0632614807873	0.731055
0.109184629803	0.0632614807873	0.731055
0.109184629803	0.0634957825679	0.731055
0.110356138707	0.0634957825679	0.731055
0.110356138707	0.0639643861293	0.731055
0.11152764761	0.0639643861293	0.731055
0.11152764761	0.0644329896907	0.731055
0.117150890347	0.0644329896907	0.731055
0.117150890347	0.0651358950328	0.731055
0.117619493908	0.0651358950328	0.731055
0.117619493908	0.0653701968135	0.731055
0.117853795689	0.0653701968135	0.731055
0.117853795689	0.0658388003749	0.731055
0.11832239925	0.0658388003749	0.731055
0.11832239925	0.066541705717	0.731055
0.119025304592	0.066541705717	0.731055
0.119025304592	0.0670103092784	0.731055
0.119493908154	0.0670103092784	0.731055
0.119493908154	0.067244611059	0.731055
0.119728209934	0.067244611059	0.731055
0.119728209934	0.0674789128397	0.731055
0.119962511715	0.0674789128397	0.731055
0.119962511715	0.0679475164011	0.731055
0.120196813496	0.0679475164011	0.731055
0.120196813496	0.0681818181818	0.731055
0.123242736645	0.0681818181818	0.731055
0.123242736645	0.0684161199625	0.731055
0.123477038425	0.0684161199625	0.731055
0.123477038425	0.0686504217432	0.731055
0.123711340206	0.0686504217432	0.731055
0.123711340206	0.0688847235239	0.731055
0.123945641987	0.0688847235239	0.731055
0.123945641987	0.0691190253046	0.731055
0.124179943768	0.0691190253046	0.731055
0.124179943768	0.0693533270853	0.731055
0.12488284911	0.0693533270853	0.731055
0.12488284911	0.0705248359888	0.731055
0.125820056232	0.0705248359888	0.731055
0.125820056232	0.0712277413308	0.731055
0.126054358013	0.0712277413308	0.731055
0.126054358013	0.0714620431115	0.731055
0.126757263355	0.0714620431115	0.731055
0.126757263355	0.0716963448922	0.731055
0.127225866917	0.0716963448922	0.731055
0.127225866917	0.0721649484536	0.731055
0.127928772259	0.0721649484536	0.731055
0.127928772259	0.0723992502343	0.731055
0.129100281162	0.0723992502343	0.731055
0.129100281162	0.072633552015	0.731055
0.129334582943	0.072633552015	0.731055
0.129334582943	0.0728678537957	0.731055
0.129803186504	0.0728678537957	0.731055
0.129803186504	0.0735707591378	0.731055
0.130740393627	0.0735707591378	0.731055
0.130740393627	0.0738050609185	0.731055
0.13167760075	0.0738050609185	0.731055
0.13167760075	0.0740393626992	0.731055
0.134020618557	0.0740393626992	0.731055
0.134020618557	0.0742736644799	0.731055
0.134254920337	0.0742736644799	0.731055
0.134254920337	0.0745079662605	0.731055
0.134957825679	0.0745079662605	0.731055
0.134957825679	0.0747422680412	0.731055
0.13519212746	0.0747422680412	0.731055
0.13519212746	0.0749765698219	0.731055
0.136129334583	0.0749765698219	0.731055
0.136129334583	0.0752108716026	0.731055
0.137300843486	0.0752108716026	0.731055
0.137300843486	0.0754451733833	0.731055
0.138940955951	0.0754451733833	0.731055
0.138940955951	0.075679475164	0.731055
0.139878163074	0.075679475164	0.731055
0.139878163074	0.0759137769447	0.731055
0.142689784442	0.0759137769447	0.731055
0.142689784442	0.0761480787254	0.731055
0.143158388004	0.0761480787254	0.731055
0.143158388004	0.0763823805061	0.731055
0.144564198688	0.0763823805061	0.731055
0.144564198688	0.0766166822868	0.731055
0.146438612933	0.0766166822868	0.731055
0.146438612933	0.0768509840675	0.731055
0.146907216495	0.0768509840675	0.731055
0.146907216495	0.0770852858482	0.731055
0.148313027179	0.0770852858482	0.731055
0.148313027179	0.0775538894096	0.731055
0.149250234302	0.0775538894096	0.731055
0.149250234302	0.0777881911903	0.731055
0.149953139644	0.0777881911903	0.731055
0.149953139644	0.0780224929709	0.731055
0.150187441425	0.0780224929709	0.731055
0.150187441425	0.0784910965323	0.731055
0.150656044986	0.0784910965323	0.731055
0.150656044986	0.078725398313	0.731055
0.151827553889	0.078725398313	0.731055
0.151827553889	0.0789597000937	0.731055
0.152764761012	0.0789597000937	0.731055
0.152764761012	0.0791940018744	0.731055
0.153701968135	0.0791940018744	0.731055
0.153701968135	0.0794283036551	0.731055
0.154639175258	0.0794283036551	0.731055
0.154639175258	0.0796626054358	0.731055
0.155810684161	0.0796626054358	0.731055
0.155810684161	0.0798969072165	0.731055
0.156279287723	0.0798969072165	0.731055
0.156279287723	0.0801312089972	0.731055
0.158153701968	0.0801312089972	0.731055
0.158153701968	0.0803655107779	0.731055
0.158388003749	0.0803655107779	0.731055
0.158388003749	0.0805998125586	0.731055
0.159090909091	0.0805998125586	0.731055
0.159090909091	0.08106841612	0.731055
0.160028116214	0.08106841612	0.731055
0.160028116214	0.0813027179007	0.731055
0.161668228679	0.0813027179007	0.731055
0.161668228679	0.081771321462	0.731055
0.161902530459	0.081771321462	0.731055
0.161902530459	0.0820056232427	0.731055
0.16213683224	0.0820056232427	0.731055
0.16213683224	0.0824742268041	0.731055
0.162839737582	0.0824742268041	0.731055
0.162839737582	0.0827085285848	0.731055
0.164714151828	0.0827085285848	0.731055
0.164714151828	0.0829428303655	0.731055
0.166354264292	0.0829428303655	0.731055
0.166354264292	0.0831771321462	0.731055
0.167291471415	0.0831771321462	0.731055
0.167291471415	0.0838800374883	0.731055
0.16893158388	0.0838800374883	0.731055
0.16893158388	0.084114339269	0.731055
0.169634489222	0.084114339269	0.731055
0.169634489222	0.0843486410497	0.731055
0.169868791003	0.0843486410497	0.731055
0.169868791003	0.0845829428304	0.731055
0.170337394564	0.0845829428304	0.731055
0.170337394564	0.0848172446111	0.731055
0.17221180881	0.0848172446111	0.731055
0.17221180881	0.0850515463918	0.731055
0.173149015933	0.0850515463918	0.731055
0.173149015933	0.0852858481724	0.731055
0.174086223055	0.0852858481724	0.731055
0.174086223055	0.0855201499531	0.731055
0.17572633552	0.0855201499531	0.731055
0.17572633552	0.0857544517338	0.731055
0.176663542643	0.0857544517338	0.731055
0.176663542643	0.0859887535145	0.731055
0.178772258669	0.0859887535145	0.731055
0.178772258669	0.0862230552952	0.731055
0.17900656045	0.0862230552952	0.731055
0.17900656045	0.0864573570759	0.731055
0.179240862231	0.0864573570759	0.731055
0.179240862231	0.0866916588566	0.731055
0.179475164011	0.0866916588566	0.731055
0.179475164011	0.0878631677601	0.731055
0.179709465792	0.0878631677601	0.731055
0.179709465792	0.0880974695408	0.731055
0.18252108716	0.0880974695408	0.731055
0.18252108716	0.0883317713215	0.731055
0.182989690722	0.0883317713215	0.731055
0.182989690722	0.0885660731022	0.731055
0.183692596064	0.0885660731022	0.731055
0.183692596064	0.0888003748828	0.731055
0.184864104967	0.0888003748828	0.731055
0.184864104967	0.0890346766635	0.731055
0.185098406748	0.0890346766635	0.731055
0.185098406748	0.0892689784442	0.731055
0.186269915651	0.0892689784442	0.731055
0.186269915651	0.0895032802249	0.731055
0.186738519213	0.0895032802249	0.731055
0.186738519213	0.0897375820056	0.731055
0.187910028116	0.0897375820056	0.731055
0.187910028116	0.0906747891284	0.731055
0.189550140581	0.0906747891284	0.731055
0.189550140581	0.0909090909091	0.731055
0.190253045923	0.0909090909091	0.731055
0.190253045923	0.0913776944705	0.731055
0.190955951265	0.0913776944705	0.731055
0.190955951265	0.0916119962512	0.731055
0.192127460169	0.0916119962512	0.731055
0.192127460169	0.0918462980319	0.731055
0.193298969072	0.0918462980319	0.731055
0.193298969072	0.0920805998126	0.731055
0.193533270853	0.0920805998126	0.731055
0.193533270853	0.0923149015933	0.731055
0.193767572634	0.0923149015933	0.731055
0.193767572634	0.0925492033739	0.731055
0.194704779756	0.0925492033739	0.731055
0.194704779756	0.0927835051546	0.731055
0.195407685098	0.0927835051546	0.731055
0.195407685098	0.0934864104967	0.731055
0.196813495783	0.0934864104967	0.731055
0.196813495783	0.0939550140581	0.731055
0.197047797563	0.0939550140581	0.731055
0.197047797563	0.0941893158388	0.731055
0.197985004686	0.0941893158388	0.731055
0.197985004686	0.0944236176195	0.731055
0.200562324274	0.0944236176195	0.731055
0.200562324274	0.0946579194002	0.731055
0.203842549203	0.0946579194002	0.731055
0.203842549203	0.0951265229616	0.731055
0.204076850984	0.0951265229616	0.731055
0.204076850984	0.095595126523	0.731055
0.205482661668	0.095595126523	0.731055
0.205482661668	0.0960637300843	0.731055
0.206654170572	0.0960637300843	0.731055
0.206654170572	0.096298031865	0.731055
0.208997188379	0.096298031865	0.731055
0.208997188379	0.0965323336457	0.731055
0.209934395501	0.0965323336457	0.731055
0.209934395501	0.0972352389878	0.731055
0.212511715089	0.0972352389878	0.731055
0.212511715089	0.0974695407685	0.731055
0.213214620431	0.0974695407685	0.731055
0.213214620431	0.0977038425492	0.731055
0.214151827554	0.0977038425492	0.731055
0.214151827554	0.0979381443299	0.731055
0.214854732896	0.0979381443299	0.731055
0.214854732896	0.0984067478913	0.731055
0.216026241799	0.0984067478913	0.731055
0.216026241799	0.098641049672	0.731055
0.219306466729	0.098641049672	0.731055
0.219306466729	0.0991096532334	0.731055
0.221883786317	0.0991096532334	0.731055
0.221883786317	0.0993439550141	0.731055
0.222118088097	0.0993439550141	0.731055
0.222118088097	0.0995782567948	0.731055
0.222352389878	0.0995782567948	0.731055
0.222352389878	0.0998125585754	0.731055
0.226101218369	0.0998125585754	0.731055
0.226101218369	0.100046860356	0.731055
0.228444236176	0.100046860356	0.731055
0.228444236176	0.100281162137	0.731055
0.229147141518	0.100281162137	0.731055
0.229147141518	0.100515463918	0.731055
0.232895970009	0.100515463918	0.731055
0.232895970009	0.100749765698	0.731055
0.235004686036	0.100749765698	0.731055
0.235004686036	0.100984067479	0.731055
0.235707591378	0.100984067479	0.731055
0.235707591378	0.10121836926	0.731055
0.238284910965	0.10121836926	0.731055
0.238284910965	0.10145267104	0.731055
0.240159325211	0.10145267104	0.731055
0.240159325211	0.101686972821	0.731055
0.241096532334	0.101686972821	0.731055
0.241096532334	0.101921274602	0.731055
0.242736644799	0.101921274602	0.731055
0.242736644799	0.102155576382	0.731055
0.242970946579	0.102155576382	0.731055
0.242970946579	0.102389878163	0.731055
0.243439550141	0.102389878163	0.731055
0.243439550141	0.102624179944	0.731055
0.245548266167	0.102624179944	0.731055
0.245548266167	0.102858481724	0.731055
0.248125585754	0.102858481724	0.731055
0.248125585754	0.103092783505	0.731055
0.249765698219	0.103092783505	0.731055
0.249765698219	0.103327085286	0.731055
0.250702905342	0.103327085286	0.731055
0.250702905342	0.103561387067	0.731055
0.251171508903	0.103561387067	0.731055
0.251171508903	0.103795688847	0.731055
0.251874414246	0.103795688847	0.731055
0.251874414246	0.104029990628	0.731055
0.254217432052	0.104029990628	0.731055
0.254217432052	0.104498594189	0.731055
0.256560449859	0.104498594189	0.731055
0.256560449859	0.105201499531	0.731055
0.257497656982	0.105201499531	0.731055
0.257497656982	0.105435801312	0.731055
0.261949390815	0.105435801312	0.731055
0.261949390815	0.105670103093	0.731055
0.264761012184	0.105670103093	0.731055
0.264761012184	0.105904404873	0.731055
0.265229615745	0.105904404873	0.731055
0.265229615745	0.106138706654	0.731055
0.265932521087	0.106138706654	0.731055
0.265932521087	0.106607310216	0.731055
0.266166822868	0.106607310216	0.731055
0.266166822868	0.106841611996	0.731055
0.267806935333	0.106841611996	0.731055
0.267806935333	0.107075913777	0.731055
0.268041237113	0.107075913777	0.731055
0.268041237113	0.107310215558	0.731055
0.268978444236	0.107310215558	0.731055
0.268978444236	0.107778819119	0.731055
0.269915651359	0.107778819119	0.731055
0.269915651359	0.1080131209	0.731055
0.272492970947	0.1080131209	0.731055
0.272492970947	0.10824742268	0.731055
0.273898781631	0.10824742268	0.731055
0.273898781631	0.108716026242	0.731055
0.274367385192	0.108716026242	0.731055
0.274367385192	0.108950328022	0.731055
0.274601686973	0.108950328022	0.731055
0.274601686973	0.109184629803	0.731055
0.276241799438	0.109184629803	0.731055
0.276241799438	0.109418931584	0.731055
0.276476101218	0.109418931584	0.731055
0.276476101218	0.109653233365	0.731055
0.276710402999	0.109653233365	0.731055
0.276710402999	0.109887535145	0.731055
0.277647610122	0.109887535145	0.731055
0.277647610122	0.110121836926	0.731055
0.279053420806	0.110121836926	0.731055
0.279053420806	0.110356138707	0.731055
0.279990627929	0.110356138707	0.731055
0.279990627929	0.110590440487	0.731055
0.282099343955	0.110590440487	0.731055
0.282099343955	0.110824742268	0.731055
0.283036551078	0.110824742268	0.731055
0.283036551078	0.111059044049	0.731055
0.286551077788	0.111059044049	0.731055
0.286551077788	0.111293345829	0.731055
0.286785379569	0.111293345829	0.731055
0.286785379569	0.11152764761	0.731055
0.290065604499	0.11152764761	0.731055
0.290065604499	0.111761949391	0.731055
0.293111527648	0.111761949391	0.731055
0.293111527648	0.111996251172	0.731055
0.293580131209	0.111996251172	0.731055
0.293580131209	0.112230552952	0.731055
0.29404873477	0.112230552952	0.731055
0.29404873477	0.112464854733	0.731055
0.294283036551	0.112464854733	0.731055
0.294283036551	0.112699156514	0.731055
0.295220243674	0.112699156514	0.731055
0.295220243674	0.112933458294	0.731055
0.2973289597	0.112933458294	0.731055
0.2973289597	0.113167760075	0.731055
0.297797563261	0.113167760075	0.731055
0.297797563261	0.113402061856	0.731055
0.298266166823	0.113402061856	0.731055
0.298266166823	0.113636363636	0.731055
0.298500468604	0.113636363636	0.731055
0.298500468604	0.113870665417	0.731055
0.298734770384	0.113870665417	0.731055
0.298734770384	0.114339268978	0.731055
0.299906279288	0.114339268978	0.731055
0.299906279288	0.114573570759	0.731055
0.300374882849	0.114573570759	0.731055
0.300374882849	0.11480787254	0.731055
0.301780693533	0.11480787254	0.731055
0.301780693533	0.115042174321	0.731055
0.302717900656	0.115042174321	0.731055
0.302717900656	0.115276476101	0.731055
0.302952202437	0.115276476101	0.731055
0.302952202437	0.115745079663	0.731055
0.303186504217	0.115745079663	0.731055
0.303186504217	0.116447985005	0.731055
0.30412371134	0.116447985005	0.731055
0.30412371134	0.116682286785	0.731055
0.307169634489	0.116682286785	0.731055
0.307169634489	0.116916588566	0.731055
0.308341143393	0.116916588566	0.731055
0.308341143393	0.117385192127	0.731055
0.310215557638	0.117385192127	0.731055
0.310215557638	0.117619493908	0.731055
0.3106841612	0.117619493908	0.731055
0.3106841612	0.117853795689	0.731055
0.311621368322	0.117853795689	0.731055
0.311621368322	0.11808809747	0.731055
0.313027179007	0.11808809747	0.731055
0.313027179007	0.11832239925	0.731055
0.313964386129	0.11832239925	0.731055
0.313964386129	0.118556701031	0.731055
0.316307403936	0.118556701031	0.731055
0.316307403936	0.118791002812	0.731055
0.318416119963	0.118791002812	0.731055
0.318416119963	0.119025304592	0.731055
0.319119025305	0.119025304592	0.731055
0.319119025305	0.119728209934	0.731055
0.319587628866	0.119728209934	0.731055
0.319587628866	0.119962511715	0.731055
0.320290534208	0.119962511715	0.731055
0.320290534208	0.120196813496	0.731055
0.320524835989	0.120196813496	0.731055
0.320524835989	0.120665417057	0.731055
0.32099343955	0.120665417057	0.731055
0.32099343955	0.120899718838	0.731055
0.321696344892	0.120899718838	0.731055
0.321696344892	0.121134020619	0.731055
0.322399250234	0.121134020619	0.731055
0.322399250234	0.121368322399	0.731055
0.322633552015	0.121368322399	0.731055
0.322633552015	0.12160262418	0.731055
0.322867853796	0.12160262418	0.731055
0.322867853796	0.122305529522	0.731055
0.323336457357	0.122305529522	0.731055
0.323336457357	0.123242736645	0.731055
0.325210871603	0.123242736645	0.731055
0.325210871603	0.123477038425	0.731055
0.325679475164	0.123477038425	0.731055
0.325679475164	0.123945641987	0.731055
0.325913776945	0.123945641987	0.731055
0.325913776945	0.124179943768	0.731055
0.327085285848	0.124179943768	0.731055
0.327085285848	0.124414245548	0.731055
0.327319587629	0.124414245548	0.731055
0.327319587629	0.12488284911	0.731055
0.32755388941	0.12488284911	0.731055
0.32755388941	0.12511715089	0.731055
0.328022492971	0.12511715089	0.731055
0.328022492971	0.125351452671	0.731055
0.329194001874	0.125351452671	0.731055
0.329194001874	0.125820056232	0.731055
0.329896907216	0.125820056232	0.731055
0.329896907216	0.126054358013	0.731055
0.330599812559	0.126054358013	0.731055
0.330599812559	0.126522961575	0.731055
0.33106841612	0.126522961575	0.731055
0.33106841612	0.126757263355	0.731055
0.331302717901	0.126757263355	0.731055
0.331302717901	0.127460168697	0.731055
0.331537019681	0.127460168697	0.731055
0.331537019681	0.127694470478	0.731055
0.331771321462	0.127694470478	0.731055
0.331771321462	0.127928772259	0.731055
0.333411433927	0.127928772259	0.731055
0.333411433927	0.12839737582	0.731055
0.333645735708	0.12839737582	0.731055
0.333645735708	0.128631677601	0.731055
0.33434864105	0.128631677601	0.731055
0.33434864105	0.128865979381	0.731055
0.334817244611	0.128865979381	0.731055
0.334817244611	0.129100281162	0.731055
0.335051546392	0.129100281162	0.731055
0.335051546392	0.129803186504	0.731055
0.335520149953	0.129803186504	0.731055
0.335520149953	0.130271790066	0.731055
0.335754451734	0.130271790066	0.731055
0.335754451734	0.130740393627	0.731055
0.335988753515	0.130740393627	0.731055
0.335988753515	0.130974695408	0.731055
0.336223055295	0.130974695408	0.731055
0.336223055295	0.131443298969	0.731055
0.336925960637	0.131443298969	0.731055
0.336925960637	0.13167760075	0.731055
0.337160262418	0.13167760075	0.731055
0.337160262418	0.13191190253	0.731055
0.33786316776	0.13191190253	0.731055
0.33786316776	0.132146204311	0.731055
0.339503280225	0.132146204311	0.731055
0.339503280225	0.132380506092	0.731055
0.339737582006	0.132380506092	0.731055
0.339737582006	0.132849109653	0.731055
0.340440487348	0.132849109653	0.731055
0.340440487348	0.133083411434	0.731055
0.340909090909	0.133083411434	0.731055
0.340909090909	0.133317713215	0.731055
0.342080599813	0.133317713215	0.731055
0.342080599813	0.134020618557	0.731055
0.342783505155	0.134020618557	0.731055
0.342783505155	0.134254920337	0.731055
0.343252108716	0.134254920337	0.731055
0.343252108716	0.134489222118	0.731055
0.343486410497	0.134489222118	0.731055
0.343486410497	0.13519212746	0.731055
0.343955014058	0.13519212746	0.731055
0.343955014058	0.136363636364	0.731055
0.345829428304	0.136363636364	0.731055
0.345829428304	0.136832239925	0.731055
0.346298031865	0.136832239925	0.731055
0.346298031865	0.137066541706	0.731055
0.347000937207	0.137066541706	0.731055
0.347000937207	0.137300843486	0.731055
0.347235238988	0.137300843486	0.731055
0.347235238988	0.137535145267	0.731055
0.347703842549	0.137535145267	0.731055
0.347703842549	0.137769447048	0.731055
0.348406747891	0.137769447048	0.731055
0.348406747891	0.138706654171	0.731055
0.348641049672	0.138706654171	0.731055
0.348641049672	0.139409559513	0.731055
0.348875351453	0.139409559513	0.731055
0.348875351453	0.139643861293	0.731055
0.349343955014	0.139643861293	0.731055
0.349343955014	0.139878163074	0.731055
0.349578256795	0.139878163074	0.731055
0.349578256795	0.140112464855	0.731055
0.350046860356	0.140112464855	0.731055
0.350046860356	0.140346766635	0.731055
0.350749765698	0.140346766635	0.731055
0.350749765698	0.140581068416	0.731055
0.351921274602	0.140581068416	0.731055
0.351921274602	0.141049671978	0.731055
0.352155576382	0.141049671978	0.731055
0.352155576382	0.141283973758	0.731055
0.353327085286	0.141283973758	0.731055
0.353327085286	0.14175257732	0.731055
0.354029990628	0.14175257732	0.731055
0.354029990628	0.142221180881	0.731055
0.354264292409	0.142221180881	0.731055
0.354264292409	0.142455482662	0.731055
0.35473289597	0.142455482662	0.731055
0.35473289597	0.142689784442	0.731055
0.355670103093	0.142689784442	0.731055
0.355670103093	0.144329896907	0.731055
0.355904404873	0.144329896907	0.731055
0.355904404873	0.144798500469	0.731055
0.356841611996	0.144798500469	0.731055
0.356841611996	0.145032802249	0.731055
0.357075913777	0.145032802249	0.731055
0.357075913777	0.14526710403	0.731055
0.357544517338	0.14526710403	0.731055
0.357544517338	0.145501405811	0.731055
0.357778819119	0.145501405811	0.731055
0.357778819119	0.145735707591	0.731055
0.358716026242	0.145735707591	0.731055
0.358716026242	0.146438612933	0.731055
0.358950328022	0.146438612933	0.731055
0.358950328022	0.147141518276	0.731055
0.359418931584	0.147141518276	0.731055
0.359418931584	0.147375820056	0.731055
0.360356138707	0.147375820056	0.731055
0.360356138707	0.147610121837	0.731055
0.361996251172	0.147610121837	0.731055
0.361996251172	0.14854732896	0.731055
0.362230552952	0.14854732896	0.731055
0.362230552952	0.14878163074	0.731055
0.362699156514	0.14878163074	0.731055
0.362699156514	0.149484536082	0.731055
0.362933458294	0.149484536082	0.731055
0.362933458294	0.149718837863	0.731055
0.363870665417	0.149718837863	0.731055
0.363870665417	0.151124648547	0.731055
0.364339268978	0.151124648547	0.731055
0.364339268978	0.151358950328	0.731055
0.364573570759	0.151358950328	0.731055
0.364573570759	0.151593252109	0.731055
0.36480787254	0.151593252109	0.731055
0.36480787254	0.151827553889	0.731055
0.365745079663	0.151827553889	0.731055
0.365745079663	0.15206185567	0.731055
0.366213683224	0.15206185567	0.731055
0.366213683224	0.152296157451	0.731055
0.366447985005	0.152296157451	0.731055
0.366447985005	0.152999062793	0.731055
0.366916588566	0.152999062793	0.731055
0.366916588566	0.153233364574	0.731055
0.367385192127	0.153233364574	0.731055
0.367385192127	0.153467666354	0.731055
0.367619493908	0.153467666354	0.731055
0.367619493908	0.154170571696	0.731055
0.36808809747	0.154170571696	0.731055
0.36808809747	0.154404873477	0.731055
0.369025304592	0.154404873477	0.731055
0.369025304592	0.154639175258	0.731055
0.369962511715	0.154639175258	0.731055
0.369962511715	0.154873477038	0.731055
0.370196813496	0.154873477038	0.731055
0.370196813496	0.155107778819	0.731055
0.370431115276	0.155107778819	0.731055
0.370431115276	0.156279287723	0.731055
0.371836925961	0.156279287723	0.731055
0.371836925961	0.156747891284	0.731055
0.372071227741	0.156747891284	0.731055
0.372071227741	0.156982193065	0.731055
0.373008434864	0.156982193065	0.731055
0.373008434864	0.157216494845	0.731055
0.373711340206	0.157216494845	0.731055
0.373711340206	0.157450796626	0.731055
0.374648547329	0.157450796626	0.731055
0.374648547329	0.157685098407	0.731055
0.375585754452	0.157685098407	0.731055
0.375585754452	0.158153701968	0.731055
0.377225866917	0.158153701968	0.731055
0.377225866917	0.15885660731	0.731055
0.377460168697	0.15885660731	0.731055
0.377460168697	0.159090909091	0.731055
0.377928772259	0.159090909091	0.731055
0.377928772259	0.159325210872	0.731055
0.37839737582	0.159325210872	0.731055
0.37839737582	0.159559512652	0.731055
0.379803186504	0.159559512652	0.731055
0.379803186504	0.159793814433	0.731055
0.380506091846	0.159793814433	0.731055
0.380506091846	0.160496719775	0.731055
0.38167760075	0.160496719775	0.731055
0.38167760075	0.160965323336	0.731055
0.382849109653	0.160965323336	0.731055
0.382849109653	0.162371134021	0.731055
0.383083411434	0.162371134021	0.731055
0.383083411434	0.162839737582	0.731055
0.384489222118	0.162839737582	0.731055
0.384489222118	0.164011246485	0.731055
0.385426429241	0.164011246485	0.731055
0.385426429241	0.164479850047	0.731055
0.386363636364	0.164479850047	0.731055
0.386363636364	0.164714151828	0.731055
0.387066541706	0.164714151828	0.731055
0.387066541706	0.165182755389	0.731055
0.387535145267	0.165182755389	0.731055
0.387535145267	0.16541705717	0.731055
0.387769447048	0.16541705717	0.731055
0.387769447048	0.165885660731	0.731055
0.38847235239	0.165885660731	0.731055
0.38847235239	0.166119962512	0.731055
0.389175257732	0.166119962512	0.731055
0.389175257732	0.166354264292	0.731055
0.389643861293	0.166354264292	0.731055
0.389643861293	0.166588566073	0.731055
0.389878163074	0.166588566073	0.731055
0.389878163074	0.166822867854	0.731055
0.390815370197	0.166822867854	0.731055
0.390815370197	0.167760074977	0.731055
0.391049671978	0.167760074977	0.731055
0.391049671978	0.168228678538	0.731055
0.391518275539	0.168228678538	0.731055
0.391518275539	0.168697282099	0.731055
0.3919868791	0.168697282099	0.731055
0.3919868791	0.16893158388	0.731055
0.392221180881	0.16893158388	0.731055
0.392221180881	0.169400187441	0.731055
0.392455482662	0.169400187441	0.731055
0.392455482662	0.169634489222	0.731055
0.392924086223	0.169634489222	0.731055
0.392924086223	0.169868791003	0.731055
0.393626991565	0.169868791003	0.731055
0.393626991565	0.170103092784	0.731055
0.394095595127	0.170103092784	0.731055
0.394095595127	0.170571696345	0.731055
0.394329896907	0.170571696345	0.731055
0.394329896907	0.170805998126	0.731055
0.394798500469	0.170805998126	0.731055
0.394798500469	0.171274601687	0.731055
0.395501405811	0.171274601687	0.731055
0.395501405811	0.171508903468	0.731055
0.395735707591	0.171508903468	0.731055
0.395735707591	0.171977507029	0.731055
0.396204311153	0.171977507029	0.731055
0.396204311153	0.17221180881	0.731055
0.396907216495	0.17221180881	0.731055
0.396907216495	0.17244611059	0.731055
0.397844423618	0.17244611059	0.731055
0.397844423618	0.172680412371	0.731055
0.399484536082	0.172680412371	0.731055
0.399484536082	0.172914714152	0.731055
0.400656044986	0.172914714152	0.731055
0.400656044986	0.173149015933	0.731055
0.401124648547	0.173149015933	0.731055
0.401124648547	0.173383317713	0.731055
0.401358950328	0.173383317713	0.731055
0.401358950328	0.173851921275	0.731055
0.401827553889	0.173851921275	0.731055
0.401827553889	0.174086223055	0.731055
0.402999062793	0.174086223055	0.731055
0.402999062793	0.174320524836	0.731055
0.403701968135	0.174320524836	0.731055
0.403701968135	0.174554826617	0.731055
0.403936269916	0.174554826617	0.731055
0.403936269916	0.174789128397	0.731055
0.4053420806	0.174789128397	0.731055
0.4053420806	0.17572633552	0.731055
0.405576382381	0.17572633552	0.731055
0.405576382381	0.176194939082	0.731055
0.406982193065	0.176194939082	0.731055
0.406982193065	0.176429240862	0.731055
0.409090909091	0.176429240862	0.731055
0.409090909091	0.176663542643	0.731055
0.410496719775	0.176663542643	0.731055
0.410496719775	0.176897844424	0.731055
0.410965323336	0.176897844424	0.731055
0.410965323336	0.177132146204	0.731055
0.411199625117	0.177132146204	0.731055
0.411199625117	0.177366447985	0.731055
0.412839737582	0.177366447985	0.731055
0.412839737582	0.177835051546	0.731055
0.414948453608	0.177835051546	0.731055
0.414948453608	0.178303655108	0.731055
0.415885660731	0.178303655108	0.731055
0.415885660731	0.178537956888	0.731055
0.416822867854	0.178537956888	0.731055
0.416822867854	0.178772258669	0.731055
0.417291471415	0.178772258669	0.731055
0.417291471415	0.17900656045	0.731055
0.417994376757	0.17900656045	0.731055
0.417994376757	0.179240862231	0.731055
0.418228678538	0.179240862231	0.731055
0.418228678538	0.179475164011	0.731055
0.418462980319	0.179475164011	0.731055
0.418462980319	0.179709465792	0.731055
0.418697282099	0.179709465792	0.731055
0.418697282099	0.179943767573	0.731055
0.41893158388	0.179943767573	0.731055
0.41893158388	0.180412371134	0.731055
0.420337394564	0.180412371134	0.731055
0.420337394564	0.180880974695	0.731055
0.420571696345	0.180880974695	0.731055
0.420571696345	0.181349578257	0.731055
0.421040299906	0.181349578257	0.731055
0.421040299906	0.181818181818	0.731055
0.421743205248	0.181818181818	0.731055
0.421743205248	0.18228678538	0.731055
0.422680412371	0.18228678538	0.731055
0.422680412371	0.18252108716	0.731055
0.422914714152	0.18252108716	0.731055
0.422914714152	0.182755388941	0.731055
0.423383317713	0.182755388941	0.731055
0.423383317713	0.182989690722	0.731055
0.424086223055	0.182989690722	0.731055
0.424086223055	0.183223992502	0.731055
0.424789128397	0.183223992502	0.731055
0.424789128397	0.183692596064	0.731055
0.425492033739	0.183692596064	0.731055
0.425492033739	0.183926897844	0.731055
0.42572633552	0.183926897844	0.731055
0.42572633552	0.184395501406	0.731055
0.427132146204	0.184395501406	0.731055
0.427132146204	0.184629803187	0.731055
0.428303655108	0.184629803187	0.731055
0.428303655108	0.184864104967	0.731055
0.428772258669	0.184864104967	0.731055
0.428772258669	0.185098406748	0.731055
0.430412371134	0.185098406748	0.731055
0.430412371134	0.185332708529	0.731055
0.430880974695	0.185332708529	0.731055
0.430880974695	0.186035613871	0.731055
0.434864104967	0.186035613871	0.731055
0.434864104967	0.186269915651	0.731055
0.435098406748	0.186269915651	0.731055
0.435098406748	0.186504217432	0.731055
0.436504217432	0.186504217432	0.731055
0.436504217432	0.186738519213	0.731055
0.437675726336	0.186738519213	0.731055
0.437675726336	0.187207122774	0.731055
0.440721649485	0.187207122774	0.731055
0.440721649485	0.187441424555	0.731055
0.440955951265	0.187441424555	0.731055
0.440955951265	0.188144329897	0.731055
0.442127460169	0.188144329897	0.731055
0.442127460169	0.188378631678	0.731055
0.443064667291	0.188378631678	0.731055
0.443064667291	0.189550140581	0.731055
0.443298969072	0.189550140581	0.731055
0.443298969072	0.189784442362	0.731055
0.444001874414	0.189784442362	0.731055
0.444001874414	0.190018744142	0.731055
0.444939081537	0.190018744142	0.731055
0.444939081537	0.190487347704	0.731055
0.445641986879	0.190487347704	0.731055
0.445641986879	0.190721649485	0.731055
0.44611059044	0.190721649485	0.731055
0.44611059044	0.190955951265	0.731055
0.447985004686	0.190955951265	0.731055
0.447985004686	0.191190253046	0.731055
0.448219306467	0.191190253046	0.731055
0.448219306467	0.191424554827	0.731055
0.44915651359	0.191424554827	0.731055
0.44915651359	0.191658856607	0.731055
0.44939081537	0.191658856607	0.731055
0.44939081537	0.192127460169	0.731055
0.450093720712	0.192127460169	0.731055
0.450093720712	0.192361761949	0.731055
0.450328022493	0.192361761949	0.731055
0.450328022493	0.19259606373	0.731055
0.450562324274	0.19259606373	0.731055
0.450562324274	0.192830365511	0.731055
0.450796626054	0.192830365511	0.731055
0.450796626054	0.193298969072	0.731055
0.451265229616	0.193298969072	0.731055
0.451265229616	0.193767572634	0.731055
0.451499531396	0.193767572634	0.731055
0.451499531396	0.194001874414	0.731055
0.452436738519	0.194001874414	0.731055
0.452436738519	0.194236176195	0.731055
0.453139643861	0.194236176195	0.731055
0.453139643861	0.194470477976	0.731055
0.453373945642	0.194470477976	0.731055
0.453373945642	0.194704779756	0.731055
0.455014058107	0.194704779756	0.731055
0.455014058107	0.194939081537	0.731055
0.45618556701	0.194939081537	0.731055
0.45618556701	0.195173383318	0.731055
0.457122774133	0.195173383318	0.731055
0.457122774133	0.195407685098	0.731055
0.457591377694	0.195407685098	0.731055
0.457591377694	0.195641986879	0.731055
0.458059981256	0.195641986879	0.731055
0.458059981256	0.19611059044	0.731055
0.458294283037	0.19611059044	0.731055
0.458294283037	0.196344892221	0.731055
0.458528584817	0.196344892221	0.731055
0.458528584817	0.196579194002	0.731055
0.458997188379	0.196579194002	0.731055
0.458997188379	0.197047797563	0.731055
0.459934395501	0.197047797563	0.731055
0.459934395501	0.197282099344	0.731055
0.462277413308	0.197282099344	0.731055
0.462277413308	0.197750702905	0.731055
0.46298031865	0.197750702905	0.731055
0.46298031865	0.197985004686	0.731055
0.463683223993	0.197985004686	0.731055
0.463683223993	0.198219306467	0.731055
0.463917525773	0.198219306467	0.731055
0.463917525773	0.198453608247	0.731055
0.464151827554	0.198453608247	0.731055
0.464151827554	0.198687910028	0.731055
0.464620431115	0.198687910028	0.731055
0.464620431115	0.198922211809	0.731055
0.464854732896	0.198922211809	0.731055
0.464854732896	0.19915651359	0.731055
0.467432052484	0.19915651359	0.731055
0.467432052484	0.199625117151	0.731055
0.468134957826	0.199625117151	0.731055
0.468134957826	0.200093720712	0.731055
0.470477975633	0.200093720712	0.731055
0.470477975633	0.200562324274	0.731055
0.47282099344	0.200562324274	0.731055
0.47282099344	0.200796626054	0.731055
0.47305529522	0.200796626054	0.731055
0.47305529522	0.201030927835	0.731055
0.475866916589	0.201030927835	0.731055
0.475866916589	0.201265229616	0.731055
0.477975632615	0.201265229616	0.731055
0.477975632615	0.201499531396	0.731055
0.478209934396	0.201499531396	0.731055
0.478209934396	0.201733833177	0.731055
0.478912839738	0.201733833177	0.731055
0.478912839738	0.201968134958	0.731055
0.479381443299	0.201968134958	0.731055
0.479381443299	0.202436738519	0.731055
0.47961574508	0.202436738519	0.731055
0.47961574508	0.202905342081	0.731055
0.480787253983	0.202905342081	0.731055
0.480787253983	0.203373945642	0.731055
0.482895970009	0.203373945642	0.731055
0.482895970009	0.203608247423	0.731055
0.483598875351	0.203608247423	0.731055
0.483598875351	0.204076850984	0.731055
0.484301780694	0.204076850984	0.731055
0.484301780694	0.204779756326	0.731055
0.484536082474	0.204779756326	0.731055
0.484536082474	0.205014058107	0.731055
0.485473289597	0.205014058107	0.731055
0.485473289597	0.205248359888	0.731055
0.488519212746	0.205248359888	0.731055
0.488519212746	0.205482661668	0.731055
0.488753514527	0.205482661668	0.731055
0.488753514527	0.205716963449	0.731055
0.490159325211	0.205716963449	0.731055
0.490159325211	0.20595126523	0.731055
0.491096532334	0.20595126523	0.731055
0.491096532334	0.20618556701	0.731055
0.492502343018	0.20618556701	0.731055
0.492502343018	0.206654170572	0.731055
0.49320524836	0.206654170572	0.731055
0.49320524836	0.207357075914	0.731055
0.494845360825	0.207357075914	0.731055
0.494845360825	0.207825679475	0.731055
0.496251171509	0.207825679475	0.731055
0.496251171509	0.208059981256	0.731055
0.49671977507	0.208059981256	0.731055
0.49671977507	0.208294283037	0.731055
0.496954076851	0.208294283037	0.731055
0.496954076851	0.208528584817	0.731055
0.497188378632	0.208528584817	0.731055
0.497188378632	0.208762886598	0.731055
0.498828491097	0.208762886598	0.731055
0.498828491097	0.208997188379	0.731055
0.500702905342	0.208997188379	0.731055
0.500702905342	0.209231490159	0.731055
0.501640112465	0.209231490159	0.731055
0.501640112465	0.20946579194	0.731055
0.506560449859	0.20946579194	0.731055
0.506560449859	0.209700093721	0.731055
0.507966260544	0.209700093721	0.731055
0.507966260544	0.209934395501	0.731055
0.508200562324	0.209934395501	0.731055
0.508200562324	0.210168697282	0.731055
0.508434864105	0.210168697282	0.731055
0.508434864105	0.210402999063	0.731055
0.508669165886	0.210402999063	0.731055
0.508669165886	0.210637300843	0.731055
0.509137769447	0.210637300843	0.731055
0.509137769447	0.210871602624	0.731055
0.509840674789	0.210871602624	0.731055
0.509840674789	0.211105904405	0.731055
0.511949390815	0.211105904405	0.731055
0.511949390815	0.211340206186	0.731055
0.514292408622	0.211340206186	0.731055
0.514292408622	0.211574507966	0.731055
0.514526710403	0.211574507966	0.731055
0.514526710403	0.211808809747	0.731055
0.515463917526	0.211808809747	0.731055
0.515463917526	0.212043111528	0.731055
0.516401124649	0.212043111528	0.731055
0.516401124649	0.212511715089	0.731055
0.518041237113	0.212511715089	0.731055
0.518041237113	0.21298031865	0.731055
0.518275538894	0.21298031865	0.731055
0.518275538894	0.213214620431	0.731055
0.518978444236	0.213214620431	0.731055
0.518978444236	0.213683223993	0.731055
0.52014995314	0.213683223993	0.731055
0.52014995314	0.213917525773	0.731055
0.52038425492	0.213917525773	0.731055
0.52038425492	0.214386129335	0.731055
0.520852858482	0.214386129335	0.731055
0.520852858482	0.214620431115	0.731055
0.522258669166	0.214620431115	0.731055
0.522258669166	0.215089034677	0.731055
0.522492970947	0.215089034677	0.731055
0.522492970947	0.215323336457	0.731055
0.522727272727	0.215323336457	0.731055
0.522727272727	0.215791940019	0.731055
0.525304592315	0.215791940019	0.731055
0.525304592315	0.216026241799	0.731055
0.526241799438	0.216026241799	0.731055
0.526241799438	0.216729147142	0.731055
0.52717900656	0.216729147142	0.731055
0.52717900656	0.217197750703	0.731055
0.528116213683	0.217197750703	0.731055
0.528116213683	0.217432052484	0.731055
0.529756326148	0.217432052484	0.731055
0.529756326148	0.217666354264	0.731055
0.530224929709	0.217666354264	0.731055
0.530224929709	0.217900656045	0.731055
0.532099343955	0.217900656045	0.731055
0.532099343955	0.218134957826	0.731055
0.532567947516	0.218134957826	0.731055
0.532567947516	0.218603561387	0.731055
0.532802249297	0.218603561387	0.731055
0.532802249297	0.218837863168	0.731055
0.53373945642	0.218837863168	0.731055
0.53373945642	0.219072164948	0.731055
0.534910965323	0.219072164948	0.731055
0.534910965323	0.219306466729	0.731055
0.535613870665	0.219306466729	0.731055
0.535613870665	0.21954076851	0.731055
0.535848172446	0.21954076851	0.731055
0.535848172446	0.219775070291	0.731055
0.53701968135	0.219775070291	0.731055
0.53701968135	0.220009372071	0.731055
0.537722586692	0.220009372071	0.731055
0.537722586692	0.220477975633	0.731055
0.539597000937	0.220477975633	0.731055
0.539597000937	0.220946579194	0.731055
0.541237113402	0.220946579194	0.731055
0.541237113402	0.221180880975	0.731055
0.542877225867	0.221180880975	0.731055
0.542877225867	0.221415182755	0.731055
0.543345829428	0.221415182755	0.731055
0.543345829428	0.221649484536	0.731055
0.544751640112	0.221649484536	0.731055
0.544751640112	0.221883786317	0.731055
0.547797563261	0.221883786317	0.731055
0.547797563261	0.222118088097	0.731055
0.548734770384	0.222118088097	0.731055
0.548734770384	0.222352389878	0.731055
0.550374882849	0.222352389878	0.731055
0.550374882849	0.222586691659	0.731055
0.551312089972	0.222586691659	0.731055
0.551312089972	0.22282099344	0.731055
0.551780693533	0.22282099344	0.731055
0.551780693533	0.223289597001	0.731055
0.552952202437	0.223289597001	0.731055
0.552952202437	0.223523898782	0.731055
0.553655107779	0.223523898782	0.731055
0.553655107779	0.223992502343	0.731055
0.55412371134	0.223992502343	0.731055
0.55412371134	0.224461105904	0.731055
0.556232427366	0.224461105904	0.731055
0.556232427366	0.224695407685	0.731055
0.556935332709	0.224695407685	0.731055
0.556935332709	0.224929709466	0.731055
0.559512652296	0.224929709466	0.731055
0.559512652296	0.225164011246	0.731055
0.560215557638	0.225164011246	0.731055
0.560215557638	0.225398313027	0.731055
0.561621368322	0.225398313027	0.731055
0.561621368322	0.225632614808	0.731055
0.563027179007	0.225632614808	0.731055
0.563027179007	0.226101218369	0.731055
0.563730084349	0.226101218369	0.731055
0.563730084349	0.22633552015	0.731055
0.563964386129	0.22633552015	0.731055
0.563964386129	0.226569821931	0.731055
0.564432989691	0.226569821931	0.731055
0.564432989691	0.226804123711	0.731055
0.566307403936	0.226804123711	0.731055
0.566307403936	0.227038425492	0.731055
0.567010309278	0.227038425492	0.731055
0.567010309278	0.227507029053	0.731055
0.568181818182	0.227507029053	0.731055
0.568181818182	0.227741330834	0.731055
0.569821930647	0.227741330834	0.731055
0.569821930647	0.227975632615	0.731055
0.571227741331	0.227975632615	0.731055
0.571227741331	0.228209934396	0.731055
0.573102155576	0.228209934396	0.731055
0.573102155576	0.228678537957	0.731055
0.573805060918	0.228678537957	0.731055
0.573805060918	0.228912839738	0.731055
0.574507966261	0.228912839738	0.731055
0.574507966261	0.229147141518	0.731055
0.577319587629	0.229147141518	0.731055
0.577319587629	0.229381443299	0.731055
0.57755388941	0.229381443299	0.731055
0.57755388941	0.22961574508	0.731055
0.578256794752	0.22961574508	0.731055
0.578256794752	0.22985004686	0.731055
0.579428303655	0.22985004686	0.731055
0.579428303655	0.230084348641	0.731055
0.581771321462	0.230084348641	0.731055
0.581771321462	0.230318650422	0.731055
0.582942830366	0.230318650422	0.731055
0.582942830366	0.230552952202	0.731055
0.583880037488	0.230552952202	0.731055
0.583880037488	0.230787253983	0.731055
0.58458294283	0.230787253983	0.731055
0.58458294283	0.231021555764	0.731055
0.585285848172	0.231021555764	0.731055
0.585285848172	0.231255857545	0.731055
0.58786316776	0.231255857545	0.731055
0.58786316776	0.231490159325	0.731055
0.589268978444	0.231490159325	0.731055
0.589268978444	0.231724461106	0.731055
0.592549203374	0.231724461106	0.731055
0.592549203374	0.232193064667	0.731055
0.593017806935	0.232193064667	0.731055
0.593017806935	0.232427366448	0.731055
0.594423617619	0.232427366448	0.731055
0.594423617619	0.232895970009	0.731055
0.595360824742	0.232895970009	0.731055
0.595360824742	0.23313027179	0.731055
0.597235238988	0.23313027179	0.731055
0.597235238988	0.233364573571	0.731055
0.602155576382	0.233364573571	0.731055
0.602155576382	0.233598875351	0.731055
0.602624179944	0.233598875351	0.731055
0.602624179944	0.233833177132	0.731055
0.603561387067	0.233833177132	0.731055
0.603561387067	0.234067478913	0.731055
0.604264292409	0.234067478913	0.731055
0.604264292409	0.234770384255	0.731055
0.604498594189	0.234770384255	0.731055
0.604498594189	0.235004686036	0.731055
0.605904404873	0.235004686036	0.731055
0.605904404873	0.235707591378	0.731055
0.606138706654	0.235707591378	0.731055
0.606138706654	0.235941893158	0.731055
0.607778819119	0.235941893158	0.731055
0.607778819119	0.236176194939	0.731055
0.608950328022	0.236176194939	0.731055
0.608950328022	0.23641049672	0.731055
0.615042174321	0.23641049672	0.731055
0.615042174321	0.2366447985	0.731055
0.617619493908	0.2366447985	0.731055
0.617619493908	0.236879100281	0.731055
0.61832239925	0.236879100281	0.731055
0.61832239925	0.237582005623	0.731055
0.618791002812	0.237582005623	0.731055
0.618791002812	0.237816307404	0.731055
0.620196813496	0.237816307404	0.731055
0.620196813496	0.238050609185	0.731055
0.620899718838	0.238050609185	0.731055
0.620899718838	0.238519212746	0.731055
0.621368322399	0.238519212746	0.731055
0.621368322399	0.238753514527	0.731055
0.621836925961	0.238753514527	0.731055
0.621836925961	0.238987816307	0.731055
0.62511715089	0.238987816307	0.731055
0.62511715089	0.239222118088	0.731055
0.62839737582	0.239222118088	0.731055
0.62839737582	0.239456419869	0.731055
0.628631677601	0.239456419869	0.731055
0.628631677601	0.239690721649	0.731055
0.629334582943	0.239690721649	0.731055
0.629334582943	0.23992502343	0.731055
0.632380506092	0.23992502343	0.731055
0.632380506092	0.240159325211	0.731055
0.632614807873	0.240159325211	0.731055
0.632614807873	0.240393626992	0.731055
0.633552014995	0.240393626992	0.731055
0.633552014995	0.240627928772	0.731055
0.63847235239	0.240627928772	0.731055
0.63847235239	0.240862230553	0.731055
0.639878163074	0.240862230553	0.731055
0.639878163074	0.241096532334	0.731055
0.641049671978	0.241096532334	0.731055
0.641049671978	0.241330834114	0.731055
0.64175257732	0.241330834114	0.731055
0.64175257732	0.241565135895	0.731055
0.643158388004	0.241565135895	0.731055
0.643158388004	0.241799437676	0.731055
0.646907216495	0.241799437676	0.731055
0.646907216495	0.242268041237	0.731055
0.649484536082	0.242268041237	0.731055
0.649484536082	0.242502343018	0.731055
0.649718837863	0.242502343018	0.731055
0.649718837863	0.242736644799	0.731055
0.649953139644	0.242736644799	0.731055
0.649953139644	0.242970946579	0.731055
0.652764761012	0.242970946579	0.731055
0.652764761012	0.24320524836	0.731055
0.657216494845	0.24320524836	0.731055
0.657216494845	0.243439550141	0.731055
0.660496719775	0.243439550141	0.731055
0.660496719775	0.243673851921	0.731055
0.661199625117	0.243673851921	0.731055
0.661199625117	0.244142455483	0.731055
0.662605435801	0.244142455483	0.731055
0.662605435801	0.244376757263	0.731055
0.664011246485	0.244376757263	0.731055
0.664011246485	0.244611059044	0.731055
0.667525773196	0.244611059044	0.731055
0.667525773196	0.244845360825	0.731055
0.667760074977	0.244845360825	0.731055
0.667760074977	0.245079662605	0.731055
0.668228678538	0.245079662605	0.731055
0.668228678538	0.245313964386	0.731055
0.671743205248	0.245313964386	0.731055
0.671743205248	0.245548266167	0.731055
0.678537956888	0.245548266167	0.731055
0.678537956888	0.245782567948	0.731055
0.681349578257	0.245782567948	0.731055
0.681349578257	0.24671977507	0.731055
0.684629803187	0.24671977507	0.731055
0.684629803187	0.246954076851	0.731055
0.685567010309	0.246954076851	0.731055
0.685567010309	0.247188378632	0.731055
0.686504217432	0.247188378632	0.731055
0.686504217432	0.247422680412	0.731055
0.687675726336	0.247422680412	0.731055
0.687675726336	0.247656982193	0.731055
0.688144329897	0.247656982193	0.731055
0.688144329897	0.247891283974	0.731055
0.692830365511	0.247891283974	0.731055
0.692830365511	0.248125585754	0.731055
0.693064667291	0.248125585754	0.731055
0.693064667291	0.248594189316	0.731055
0.693298969072	0.248594189316	0.731055
0.693298969072	0.248828491097	0.731055
0.694001874414	0.248828491097	0.731055
0.694001874414	0.249062792877	0.731055
0.695641986879	0.249062792877	0.731055
0.695641986879	0.249297094658	0.731055
0.696579194002	0.249297094658	0.731055
0.696579194002	0.249765698219	0.731055
0.697516401125	0.249765698219	0.731055
0.697516401125	0.25	0.731055
0.697985004686	0.25	0.731055
0.697985004686	0.250234301781	0.731055
0.69939081537	0.250234301781	0.731055
0.69939081537	0.250468603561	0.731055
0.703608247423	0.250468603561	0.731055
0.703608247423	0.250702905342	0.731055
0.713683223993	0.250702905342	0.731055
0.713683223993	0.250937207123	0.731055
0.718369259606	0.250937207123	0.731055
0.718369259606	0.251171508903	0.731055
0.718603561387	0.251171508903	0.731055
0.718603561387	0.251405810684	0.731055
0.719306466729	0.251405810684	0.731055
0.719306466729	0.251640112465	0.731055
0.720009372071	0.251640112465	0.731055
0.720009372071	0.251874414246	0.731055
0.720712277413	0.251874414246	0.731055
0.720712277413	0.252108716026	0.731055
0.720946579194	0.252108716026	0.731055
0.720946579194	0.252343017807	0.731055
0.721180880975	0.252343017807	0.731055
0.721180880975	0.252577319588	0.731055
0.723289597001	0.252577319588	0.731055
0.723289597001	0.252811621368	0.731055
0.726101218369	0.252811621368	0.731055
0.726101218369	0.253045923149	0.731055
0.728209934396	0.253045923149	0.731055
0.728209934396	0.25328022493	0.731055
0.737582005623	0.25328022493	0.731055
0.737582005623	0.25351452671	0.731055
0.738284910965	0.25351452671	0.731055
0.738284910965	0.254217432052	0.731055
0.738987816307	0.254217432052	0.731055
0.738987816307	0.254451733833	0.731055
0.739222118088	0.254451733833	0.731055
0.739222118088	0.254686035614	0.731055
0.739456419869	0.254686035614	0.731055
0.739456419869	0.254920337395	0.731055
0.739690721649	0.254920337395	0.731055
0.739690721649	0.255154639175	0.731055
0.740159325211	0.255154639175	0.731055
0.740159325211	0.255388940956	0.731055
0.740627928772	0.255388940956	0.731055
0.740627928772	0.255857544517	0.731055
0.740862230553	0.255857544517	0.731055
0.740862230553	0.256326148079	0.731055
0.741096532334	0.256326148079	0.731055
0.741096532334	0.25679475164	0.731055
0.741330834114	0.25679475164	0.731055
0.741330834114	0.257966260544	0.731055
0.742268041237	0.257966260544	0.731055
0.742268041237	0.258434864105	0.731055
0.742502343018	0.258434864105	0.731055
0.742502343018	0.259606373008	0.731055
0.742736644799	0.259606373008	0.731055
0.742736644799	0.260543580131	0.731055
0.742970946579	0.260543580131	0.731055
0.742970946579	0.261480787254	0.731055
0.74320524836	0.261480787254	0.731055
0.74320524836	0.261715089035	0.731055
0.743439550141	0.261715089035	0.731055
0.743439550141	0.261949390815	0.731055
0.743673851921	0.261949390815	0.731055
0.743673851921	0.2633552015	0.731055
0.744142455483	0.2633552015	0.731055
0.744142455483	0.263823805061	0.731055
0.744376757263	0.263823805061	0.731055
0.744376757263	0.264526710403	0.731055
0.744611059044	0.264526710403	0.731055
0.744611059044	0.264761012184	0.731055
0.744845360825	0.264761012184	0.731055
0.744845360825	0.265229615745	0.731055
0.746016869728	0.265229615745	0.731055
0.746016869728	0.265698219306	0.731055
0.746251171509	0.265698219306	0.731055
0.746251171509	0.26686972821	0.731055
0.747188378632	0.26686972821	0.731055
0.747188378632	0.267338331771	0.731055
0.747422680412	0.267338331771	0.731055
0.747422680412	0.267572633552	0.731055
0.748125585754	0.267572633552	0.731055
0.748125585754	0.268275538894	0.731055
0.748359887535	0.268275538894	0.731055
0.748359887535	0.268978444236	0.731055
0.748828491097	0.268978444236	0.731055
0.748828491097	0.269212746017	0.731055
0.749062792877	0.269212746017	0.731055
0.749062792877	0.269447047798	0.731055
0.749531396439	0.269447047798	0.731055
0.749531396439	0.27014995314	0.731055
0.750468603561	0.27014995314	0.731055
0.750468603561	0.27038425492	0.731055
0.750937207123	0.27038425492	0.731055
0.750937207123	0.270618556701	0.731055
0.751171508903	0.270618556701	0.731055
0.751171508903	0.271321462043	0.731055
0.752343017807	0.271321462043	0.731055
0.752343017807	0.271555763824	0.731055
0.752577319588	0.271555763824	0.731055
0.752577319588	0.271790065604	0.731055
0.75328022493	0.271790065604	0.731055
0.75328022493	0.272024367385	0.731055
0.753983130272	0.272024367385	0.731055
0.753983130272	0.272258669166	0.731055
0.754217432052	0.272258669166	0.731055
0.754217432052	0.272727272727	0.731055
0.754451733833	0.272727272727	0.731055
0.754451733833	0.273430178069	0.731055
0.754686035614	0.273430178069	0.731055
0.754686035614	0.273898781631	0.731055
0.754920337395	0.273898781631	0.731055
0.754920337395	0.274133083411	0.731055
0.756091846298	0.274133083411	0.731055
0.756091846298	0.274367385192	0.731055
0.756326148079	0.274367385192	0.731055
0.756326148079	0.274601686973	0.731055
0.757029053421	0.274601686973	0.731055
0.757029053421	0.274835988754	0.731055
0.757263355201	0.274835988754	0.731055
0.757263355201	0.275070290534	0.731055
0.757966260544	0.275070290534	0.731055
0.757966260544	0.275304592315	0.731055
0.758200562324	0.275304592315	0.731055
0.758200562324	0.275773195876	0.731055
0.758434864105	0.275773195876	0.731055
0.758434864105	0.276007497657	0.731055
0.758669165886	0.276007497657	0.731055
0.758669165886	0.276241799438	0.731055
0.758903467666	0.276241799438	0.731055
0.758903467666	0.276476101218	0.731055
0.759137769447	0.276476101218	0.731055
0.759137769447	0.27694470478	0.731055
0.760309278351	0.27694470478	0.731055
0.760309278351	0.27717900656	0.731055
0.761012183693	0.27717900656	0.731055
0.761012183693	0.277413308341	0.731055
0.762886597938	0.277413308341	0.731055
0.762886597938	0.277647610122	0.731055
0.7633552015	0.277647610122	0.731055
0.7633552015	0.277881911903	0.731055
0.764292408622	0.277881911903	0.731055
0.764292408622	0.278116213683	0.731055
0.764526710403	0.278116213683	0.731055
0.764526710403	0.278350515464	0.731055
0.764995313964	0.278350515464	0.731055
0.764995313964	0.278584817245	0.731055
0.765229615745	0.278584817245	0.731055
0.765229615745	0.279053420806	0.731055
0.765463917526	0.279053420806	0.731055
0.765463917526	0.279522024367	0.731055
0.765932521087	0.279522024367	0.731055
0.765932521087	0.279990627929	0.731055
0.766635426429	0.279990627929	0.731055
0.766635426429	0.28045923149	0.731055
0.76686972821	0.28045923149	0.731055
0.76686972821	0.280927835052	0.731055
0.768509840675	0.280927835052	0.731055
0.768509840675	0.281162136832	0.731055
0.769212746017	0.281162136832	0.731055
0.769212746017	0.281396438613	0.731055
0.769447047798	0.281396438613	0.731055
0.769447047798	0.281630740394	0.731055
0.77014995314	0.281630740394	0.731055
0.77014995314	0.282567947516	0.731055
0.77038425492	0.282567947516	0.731055
0.77038425492	0.282802249297	0.731055
0.770852858482	0.282802249297	0.731055
0.770852858482	0.283036551078	0.731055
0.771555763824	0.283036551078	0.731055
0.771555763824	0.283270852858	0.731055
0.771790065604	0.283270852858	0.731055
0.771790065604	0.284208059981	0.731055
0.772492970947	0.284208059981	0.731055
0.772492970947	0.285145267104	0.731055
0.772961574508	0.285145267104	0.731055
0.772961574508	0.285379568885	0.731055
0.773195876289	0.285379568885	0.731055
0.773195876289	0.286082474227	0.731055
0.77366447985	0.286082474227	0.731055
0.77366447985	0.286316776007	0.731055
0.773898781631	0.286316776007	0.731055
0.773898781631	0.28701968135	0.731055
0.774367385192	0.28701968135	0.731055
0.774367385192	0.28725398313	0.731055
0.774835988754	0.28725398313	0.731055
0.774835988754	0.287722586692	0.731055
0.775070290534	0.287722586692	0.731055
0.775070290534	0.288191190253	0.731055
0.775304592315	0.288191190253	0.731055
0.775304592315	0.288425492034	0.731055
0.776007497657	0.288425492034	0.731055
0.776007497657	0.288659793814	0.731055
0.776476101218	0.288659793814	0.731055
0.776476101218	0.288894095595	0.731055
0.778116213683	0.288894095595	0.731055
0.778116213683	0.289362699157	0.731055
0.778584817245	0.289362699157	0.731055
0.778584817245	0.289597000937	0.731055
0.779053420806	0.289597000937	0.731055
0.779053420806	0.290065604499	0.731055
0.779287722587	0.290065604499	0.731055
0.779287722587	0.29053420806	0.731055
0.779522024367	0.29053420806	0.731055
0.779522024367	0.290768509841	0.731055
0.779756326148	0.290768509841	0.731055
0.779756326148	0.291002811621	0.731055
0.779990627929	0.291002811621	0.731055
0.779990627929	0.291705716963	0.731055
0.78045923149	0.291705716963	0.731055
0.78045923149	0.291940018744	0.731055
0.780927835052	0.291940018744	0.731055
0.780927835052	0.292174320525	0.731055
0.781396438613	0.292174320525	0.731055
0.781396438613	0.292877225867	0.731055
0.781865042174	0.292877225867	0.731055
0.781865042174	0.293111527648	0.731055
0.782333645736	0.293111527648	0.731055
0.782333645736	0.293580131209	0.731055
0.783270852858	0.293580131209	0.731055
0.783270852858	0.29381443299	0.731055
0.784208059981	0.29381443299	0.731055
0.784208059981	0.294751640112	0.731055
0.784676663543	0.294751640112	0.731055
0.784676663543	0.295923149016	0.731055
0.784910965323	0.295923149016	0.731055
0.784910965323	0.296157450797	0.731055
0.785613870665	0.296157450797	0.731055
0.785613870665	0.296391752577	0.731055
0.78701968135	0.296391752577	0.731055
0.78701968135	0.296860356139	0.731055
0.788659793814	0.296860356139	0.731055
0.788659793814	0.297094657919	0.731055
0.788894095595	0.297094657919	0.731055
0.788894095595	0.2973289597	0.731055
0.789831302718	0.2973289597	0.731055
0.789831302718	0.297563261481	0.731055
0.790065604499	0.297563261481	0.731055
0.790065604499	0.297797563261	0.731055
0.790768509841	0.297797563261	0.731055
0.790768509841	0.298031865042	0.731055
0.791002811621	0.298031865042	0.731055
0.791002811621	0.298266166823	0.731055
0.791237113402	0.298266166823	0.731055
0.791237113402	0.298969072165	0.731055
0.791471415183	0.298969072165	0.731055
0.791471415183	0.299203373946	0.731055
0.791940018744	0.299203373946	0.731055
0.791940018744	0.299437675726	0.731055
0.792642924086	0.299437675726	0.731055
0.792642924086	0.299671977507	0.731055
0.793111527648	0.299671977507	0.731055
0.793111527648	0.30060918463	0.731055
0.793345829428	0.30060918463	0.731055
0.793345829428	0.30084348641	0.731055
0.79381443299	0.30084348641	0.731055
0.79381443299	0.301312089972	0.731055
0.79404873477	0.301312089972	0.731055
0.79404873477	0.302014995314	0.731055
0.795923149016	0.302014995314	0.731055
0.795923149016	0.302249297095	0.731055
0.796391752577	0.302249297095	0.731055
0.796391752577	0.302483598875	0.731055
0.798734770384	0.302483598875	0.731055
0.798734770384	0.302717900656	0.731055
0.799437675726	0.302717900656	0.731055
0.799437675726	0.303655107779	0.731055
0.799906279288	0.303655107779	0.731055
0.799906279288	0.304358013121	0.731055
0.800140581068	0.304358013121	0.731055
0.800140581068	0.305060918463	0.731055
0.80060918463	0.305060918463	0.731055
0.80060918463	0.305295220244	0.731055
0.801077788191	0.305295220244	0.731055
0.801077788191	0.305529522024	0.731055
0.802249297095	0.305529522024	0.731055
0.802249297095	0.305763823805	0.731055
0.802717900656	0.305763823805	0.731055
0.802717900656	0.306466729147	0.731055
0.803655107779	0.306466729147	0.731055
0.803655107779	0.306935332709	0.731055
0.805060918463	0.306935332709	0.731055
0.805060918463	0.307169634489	0.731055
0.805295220244	0.307169634489	0.731055
0.805295220244	0.30740393627	0.731055
0.806935332709	0.30740393627	0.731055
0.806935332709	0.307638238051	0.731055
0.807872539831	0.307638238051	0.731055
0.807872539831	0.307872539831	0.731055
0.808106841612	0.307872539831	0.731055
0.808106841612	0.308106841612	0.731055
0.808341143393	0.308106841612	0.731055
0.808341143393	0.309512652296	0.731055
0.808809746954	0.309512652296	0.731055
0.808809746954	0.309746954077	0.731055
0.8106841612	0.309746954077	0.731055
0.8106841612	0.309981255858	0.731055
0.811387066542	0.309981255858	0.731055
0.811387066542	0.310215557638	0.731055
0.812089971884	0.310215557638	0.731055
0.812089971884	0.3106841612	0.731055
0.813027179007	0.3106841612	0.731055
0.813027179007	0.31091846298	0.731055
0.813964386129	0.31091846298	0.731055
0.813964386129	0.311152764761	0.731055
0.815604498594	0.311152764761	0.731055
0.815604498594	0.311621368322	0.731055
0.817010309278	0.311621368322	0.731055
0.817010309278	0.311855670103	0.731055
0.817244611059	0.311855670103	0.731055
0.817244611059	0.312089971884	0.731055
0.81747891284	0.312089971884	0.731055
0.81747891284	0.312324273664	0.731055
0.818416119963	0.312324273664	0.731055
0.818416119963	0.312558575445	0.731055
0.818650421743	0.312558575445	0.731055
0.818650421743	0.312792877226	0.731055
0.82099343955	0.312792877226	0.731055
0.82099343955	0.313027179007	0.731055
0.821462043112	0.313027179007	0.731055
0.821462043112	0.313261480787	0.731055
0.821696344892	0.313261480787	0.731055
0.821696344892	0.313495782568	0.731055
0.825210871603	0.313495782568	0.731055
0.825210871603	0.313964386129	0.731055
0.825445173383	0.313964386129	0.731055
0.825445173383	0.31419868791	0.731055
0.827085285848	0.31419868791	0.731055
0.827085285848	0.314432989691	0.731055
0.827319587629	0.314432989691	0.731055
0.827319587629	0.314667291471	0.731055
0.82755388941	0.314667291471	0.731055
0.82755388941	0.314901593252	0.731055
0.82778819119	0.314901593252	0.731055
0.82778819119	0.315135895033	0.731055
0.828022492971	0.315135895033	0.731055
0.828022492971	0.315370196813	0.731055
0.83106841612	0.315370196813	0.731055
0.83106841612	0.315604498594	0.731055
0.833411433927	0.315604498594	0.731055
0.833411433927	0.315838800375	0.731055
0.835051546392	0.315838800375	0.731055
0.835051546392	0.316073102156	0.731055
0.835988753515	0.316073102156	0.731055
0.835988753515	0.316776007498	0.731055
0.837160262418	0.316776007498	0.731055
0.837160262418	0.317010309278	0.731055
0.837628865979	0.317010309278	0.731055
0.837628865979	0.317947516401	0.731055
0.838097469541	0.317947516401	0.731055
0.838097469541	0.318181818182	0.731055
0.838566073102	0.318181818182	0.731055
0.838566073102	0.318884723524	0.731055
0.839034676664	0.318884723524	0.731055
0.839034676664	0.319119025305	0.731055
0.840206185567	0.319119025305	0.731055
0.840206185567	0.320290534208	0.731055
0.84114339269	0.320290534208	0.731055
0.84114339269	0.320524835989	0.731055
0.842783505155	0.320524835989	0.731055
0.842783505155	0.320759137769	0.731055
0.843017806935	0.320759137769	0.731055
0.843017806935	0.32099343955	0.731055
0.843486410497	0.32099343955	0.731055
0.843486410497	0.321462043112	0.731055
0.843720712277	0.321462043112	0.731055
0.843720712277	0.321696344892	0.731055
0.844423617619	0.321696344892	0.731055
0.844423617619	0.321930646673	0.731055
0.845829428304	0.321930646673	0.731055
0.845829428304	0.322164948454	0.731055
0.848406747891	0.322164948454	0.731055
0.848406747891	0.322399250234	0.731055
0.849109653233	0.322399250234	0.731055
0.849109653233	0.322633552015	0.731055
0.849343955014	0.322633552015	0.731055
0.849343955014	0.322867853796	0.731055
0.849812558575	0.322867853796	0.731055
0.849812558575	0.323102155576	0.731055
0.850515463918	0.323102155576	0.731055
0.850515463918	0.323336457357	0.731055
0.850749765698	0.323336457357	0.731055
0.850749765698	0.323805060918	0.731055
0.850984067479	0.323805060918	0.731055
0.850984067479	0.324039362699	0.731055
0.85121836926	0.324039362699	0.731055
0.85121836926	0.32427366448	0.731055
0.85145267104	0.32427366448	0.731055
0.85145267104	0.324742268041	0.731055
0.852624179944	0.324742268041	0.731055
0.852624179944	0.324976569822	0.731055
0.852858481724	0.324976569822	0.731055
0.852858481724	0.325210871603	0.731055
0.853795688847	0.325210871603	0.731055
0.853795688847	0.325445173383	0.731055
0.854029990628	0.325445173383	0.731055
0.854029990628	0.325913776945	0.731055
0.854264292409	0.325913776945	0.731055
0.854264292409	0.326148078725	0.731055
0.85473289597	0.326148078725	0.731055
0.85473289597	0.326382380506	0.731055
0.855201499531	0.326382380506	0.731055
0.855201499531	0.326850984067	0.731055
0.856373008435	0.326850984067	0.731055
0.856373008435	0.327085285848	0.731055
0.8580131209	0.327085285848	0.731055
0.8580131209	0.327319587629	0.731055
0.85824742268	0.327319587629	0.731055
0.85824742268	0.32755388941	0.731055
0.859418931584	0.32755388941	0.731055
0.859418931584	0.328022492971	0.731055
0.861293345829	0.328022492971	0.731055
0.861293345829	0.328256794752	0.731055
0.86152764761	0.328256794752	0.731055
0.86152764761	0.328725398313	0.731055
0.861761949391	0.328725398313	0.731055
0.861761949391	0.329194001874	0.731055
0.862230552952	0.329194001874	0.731055
0.862230552952	0.329662605436	0.731055
0.862933458294	0.329662605436	0.731055
0.862933458294	0.330599812559	0.731055
0.865745079663	0.330599812559	0.731055
0.865745079663	0.330834114339	0.731055
0.867150890347	0.330834114339	0.731055
0.867150890347	0.33106841612	0.731055
0.868556701031	0.33106841612	0.731055
0.868556701031	0.331302717901	0.731055
0.869025304592	0.331302717901	0.731055
0.869025304592	0.331537019681	0.731055
0.869962511715	0.331537019681	0.731055
0.869962511715	0.332005623243	0.731055
0.872071227741	0.332005623243	0.731055
0.872071227741	0.332474226804	0.731055
0.872539831303	0.332474226804	0.731055
0.872539831303	0.332708528585	0.731055
0.873477038425	0.332708528585	0.731055
0.873477038425	0.333645735708	0.731055
0.874179943768	0.333645735708	0.731055
0.874179943768	0.333880037488	0.731055
0.87488284911	0.333880037488	0.731055
0.87488284911	0.334114339269	0.731055
0.87511715089	0.334114339269	0.731055
0.87511715089	0.33434864105	0.731055
0.876991565136	0.33434864105	0.731055
0.876991565136	0.33458294283	0.731055
0.878631677601	0.33458294283	0.731055
0.878631677601	0.334817244611	0.731055
0.879100281162	0.334817244611	0.731055
0.879100281162	0.335051546392	0.731055
0.879803186504	0.335051546392	0.731055
0.879803186504	0.335285848172	0.731055
0.880506091846	0.335285848172	0.731055
0.880506091846	0.335520149953	0.731055
0.880740393627	0.335520149953	0.731055
0.880740393627	0.335988753515	0.731055
0.880974695408	0.335988753515	0.731055
0.880974695408	0.336223055295	0.731055
0.881208997188	0.336223055295	0.731055
0.881208997188	0.336457357076	0.731055
0.884020618557	0.336457357076	0.731055
0.884020618557	0.336925960637	0.731055
0.884254920337	0.336925960637	0.731055
0.884254920337	0.337160262418	0.731055
0.885426429241	0.337160262418	0.731055
0.885426429241	0.337628865979	0.731055
0.885895032802	0.337628865979	0.731055
0.885895032802	0.338331771321	0.731055
0.886832239925	0.338331771321	0.731055
0.886832239925	0.338566073102	0.731055
0.887300843486	0.338566073102	0.731055
0.887300843486	0.338800374883	0.731055
0.888003748828	0.338800374883	0.731055
0.888003748828	0.339034676664	0.731055
0.888238050609	0.339034676664	0.731055
0.888238050609	0.339503280225	0.731055
0.889175257732	0.339503280225	0.731055
0.889175257732	0.339737582006	0.731055
0.889643861293	0.339737582006	0.731055
0.889643861293	0.339971883786	0.731055
0.889878163074	0.339971883786	0.731055
0.889878163074	0.340206185567	0.731055
0.891049671978	0.340206185567	0.731055
0.891049671978	0.340674789128	0.731055
0.893158388004	0.340674789128	0.731055
0.893158388004	0.340909090909	0.731055
0.894329896907	0.340909090909	0.731055
0.894329896907	0.34114339269	0.731055
0.894798500469	0.34114339269	0.731055
0.894798500469	0.34137769447	0.731055
0.895032802249	0.34137769447	0.731055
0.895032802249	0.342080599813	0.731055
0.897141518276	0.342080599813	0.731055
0.897141518276	0.342314901593	0.731055
0.89854732896	0.342314901593	0.731055
0.89854732896	0.342549203374	0.731055
0.899718837863	0.342549203374	0.731055
0.899718837863	0.342783505155	0.731055
0.899953139644	0.342783505155	0.731055
0.899953139644	0.343252108716	0.731055
0.900187441425	0.343252108716	0.731055
0.900187441425	0.343486410497	0.731055
0.901827553889	0.343486410497	0.731055
0.901827553889	0.343720712277	0.731055
0.90206185567	0.343720712277	0.731055
0.90206185567	0.343955014058	0.731055
[truncated: 4,321 more rows]
